# Supplementary material for: An Evolutionary Analysis of the Secoviridae Family of Viruses
Source: PLoS One. 2014 Sep 2;9(9):e106305. doi: 10.1371/journal.pone.0106305 (PMC4152289; doi:10.1371/journal.pone.0106305)
Supplement: Table S3 — R-squared values Time-stamped vs. Random. (XLSX) [file pone.0106305.s006.xlsx]

## Sheet: R values
		R squared
ArMV	tipped	0.7783
	random	0.00192
BBWV2	tipped	0.1116
	random	0.027781
BPMV	tipped	0.0001176
	random	2.72e-05
BRV	tipped	0.9031
	random	0.4375
GFLV	tipped	0.06494
	random	0.02316
RTSV	tipped	0.5554
	random	0.03045
SMoV	tipped	0.0013826
	random	0.349
ToRSV	tipped	0.1501
	random	0.1043
TRSV	tipped	0.00788
	random	0.0725
	Table S3. Goodness of fit (R-squared) values obtained with regression analyses time-tipped versus date-randomized neighborjoining trees using Path-O-Gen software (http://tree.bio.ed.ac.uk/software/pathogen/). Trees were generated in ClustalX (J.D.Thompson et al (1994) Clustal-W - Improving the Sensitivity of Progressive Multiple Sequence Alignment through Sequence Weighting, Position-Specific Gap…
