# Supplementary material for: An Evolutionary Analysis of the Secoviridae Family of Viruses
Source: PLoS One. 2014 Sep 2;9(9):e106305. doi: 10.1371/journal.pone.0106305 (PMC4152289; doi:10.1371/journal.pone.0106305)
Supplement: Table S6 — Virus ICTV Species BLAST. (XLSX) [file pone.0106305.s009.xlsx]

## Sheet: LIST
Species	Annotation	e-value	Acc. number
CRLV CP
PLANT
Apple latent spherical	108K polyprotein [Apple latent spherical virus] >dbj|BAA90830.1| 108K polyprotein [Apple latent spherical virus]	0	NP_620569.1
Arracacha virus B	polyprotein [Arracacha virus B] >gb|AFX93742.1| polyprotein [Arracacha virus B]	8e-47	YP_007697621.1
ANIMAL
Varroa destructor virus-1	polyprotein [Varroa destructor virus-1]	2e-07	AEM63700.1
Deformed wing virus	polyprotein [Deformed wing virus]	3e-07	ADK55525.1
Kashmir bee virus	structural polyprotein [Kashmir bee virus]	0.0001	AAR19088.1
Spodoptera exigua iflavirus 1	structural protein [Spodoptera exigua iflavirus 1]	0.0001	YP_004935364.1
Infectious flacherie virus	polyprotein [Infectious flacherie virus] >dbj|BAA25371.1| polyprotein [Infectious flacherie virus]	0.001	NP_620559.1
Swine pasivirus 1	polyprotein [Parechovirus-like virus PLV-CHN]	0.001	AFV31450.1
CRLV Pro
PLANT
Apple latent spherical virus	cysteine protease [Apple latent spherical virus]	9e-127	NP_734021.1
Arracacha virus B	polyprotein [Arracacha virus B]	5e-16	AFI74271.1
Keunjorong mosaic virus	NIa-Pro protein [Keunjorong mosaic virus]	0.002	YP_006424003.1
Apium virus Y	NIa-Pro [Apium virus Y]	0.023	YP_004123961.1
Pokeweed mosaic virus	polyprotein [Pokeweed mosaic virus]	0.59	YP_006908650.1
ANIMAL
Kobuvirus dog/AN211D/USA/2009	polyprotein [Kobuvirus dog/AN211D/USA/2009]	6e-34	AEL19656.1
Mouse kobuvirus M-5/USA/2010	polyprotein [Mouse kobuvirus M-5/USA/2010] >gb|AEM05831.1| polyprotein [Mouse kobuvirus M-5/USA/2010]	1e-31	YP_004782207.1
Aichivirus A	hypothetical protein [Aichivirus B] >dbj|BAC23066.1| unnamed protein product [Aichivirus B]	8e-23	NP_740257.1
Porcine kobuvirus	polyprotein [Porcine kobuvirus]	3e-22	AGG20313.1
Salivirus A	3C [Salivirus NG-J1]	6e-13	YP_003038643.1
Orthoturdivirus	polyprotein [Turdivirus 1]	3e-09	ADL38958.1
Turkey gallivirus	polyprotein [Turkey gallivirus] >gb|AFO66657.1| polyprotein [Turkey gallivirus]	2e-08	YP_006576515.1
Cadicivirus A	polyprotein P2-P3 [Canine picodicistrovirus]	0.008	AFB77701.1
Cosavirus A	polyprotein [Human cosavirus B] >gb|ACL15190.1| polyprotein [Human cosavirus B1]	0.013	YP_002956075.1
Duck hepatitis A virus	polyprotein [Duck hepatitis A virus 3]	0.034	ACY72332.1
Solenopsis invicta virus-1	nonstructural polyprotein [Solenopsis invicta virus-1] >gb|AAU85375.1| nonstructural polyprotein [Solenopsis invicta virus-1]	0.038	YP_164440.1
Equine rhinitis B virus	polyprotein [Equine rhinitis B virus 2]	0.15	AAK91591.1
Bovine rhinitis A virus	polyprotein [Bovine rhinitis A virus]	0.16	AFC40221.1
Bovine hungarovirus	3C [Bovine hungarovirus]	0.22	YP_006846326.1
Rosavirus M-7	polyprotein [Rosavirus M-7]	0.34	AEM05832.2
Aphid lethal paralysis virus	nonstructural polyprotein [Aphid lethal paralysis virus] >gb|AAN61470.1| nonstructural polyprotein [Aphid lethal paralysis virus]	0.39	NP_733845.1
Encephalomyocarditis virus	polyprotein [Encephalomyocarditis virus]	0.57	ACQ90253.1
Ljungan virus	Picornain 3C [Ljungan virus]	0.63	NP_705883.1
Himetobi P virus	nonstructural protein precursor [Himetobi P virus]	1.1	BAD27584.1
Sebokele virus 1	3C protein [Sebokele virus 1]	1.5	YP_008119843.1
Acute bee paralysis virus	replicase polyprotein [Acute bee paralysis virus]	1.8	AAN63803.2
Slow bee paralysis virus	polyprotein [Slow bee paralysis virus]	2.7	ADI46683.1
Kashmir bee virus	non-structural polyprotein [Kashmir bee virus] >gb|AAP32283.1| non-structural polyprotein [Kashmir bee virus]	3.2	NP_851403.1
Human cosavirus F	polyprotein [Human cosavirus F]	4.4	AFJ04539.1
Foot-and-mouth disease virus	polyprotein [Foot-and-mouth disease virus - type SAT 1]	4.6	AAT01789.1
Human parechovirus	polyprotein [Human parechovirus 1]	9.6	ADA79680.1
RTSV CP
PLANT
Maize chlorotic dwarf virus	polyprotein [Maize chlorotic dwarf virus]	7e-155	NP_619716.1
Parsnip yellow fleck virus	polyprotein [Parsnip yellow fleck virus]	3e-05	NP_619734.1
ANIMAL
Nilaparvata lugens honeydew virus-2	polyprotein [Nilaparvata lugens honeydew virus-2] >dbj|BAN57352.1| polyprotein [Nilaparvata lugens honeydew virus-2]	1e-83	YP_008130309.1
Nilaparvata lugens honeydew virus-1	polyprotein [Nilaparvata lugens honeydew virus-1]	2e-32	BAN19725.1
Brevicoryne brassicae picorna-like virus	polyprotein [Brevicoryne brassicae picorna-like virus] >gb|ABP57198.1| polyprotein [Brevicoryne brassicae picorna-like virus]	1e-25	YP_001285409.1
Deformed wing virus	capsid protein [Deformed wing virus]	1e-18	ADY05270.1
Varroa destructor virus-1	polyprotein [Varroa destructor virus-1]	7e-17	AEM63700.1
Slow bee paralysis virus	polyprotein [Slow bee paralysis virus]	2e-13	ADI46683.1
Hepatitis A virus	1C VP3 mature peptide [Hepatitis A virus]	2e-11	NP_740551.1
Aichivirus A	VP3 [Aichi virus 1]	1e-07	NP_740436.1
Avian encephalomyelitis virus	structural protein VP3 [Avian encephalomyelitis virus]	1e-07	AAO73944.1
Nilaparvata lugens honeydew virus-3	polyprotein [Nilaparvata lugens honeydew virus-3] >dbj|BAN57353.1| polyprotein [Nilaparvata lugens honeydew virus-3]	2e-07	YP_008130310.1
Porcine kobuvirus	polyprotein [Porcine kobuvirus swine/S-1-HUN/2007/Hungary] >gb|ACI95948.2| polyprotein [Porcine kobuvirus swine/S-1-HUN/2007/Hungary]	2e-07	YP_002456506.1
Aphid lethal paralysis virus	capsid protein precursor [Aphid lethal paralysis virus] >gb|AAN61471.1| capsid protein precursor [Aphid lethal paralysis virus]	3e-07	NP_733846.1
Perina nuda virus	polyprotein [Perina nuda virus] >gb|AAL06289.1|AF323747_1 polyprotein [Perina nuda virus]	6e-07	NP_277061.1
Black queen cell virus	structural polyprotein [Black queen cell virus] >gb|AAF72338.1|AF183905_2 structural polyprotein [black queen cell virus]	2e-06	NP_620565.1
Rhopalosiphum padi virus	structural polyprotein [Rhopalosiphum padi virus]	2e-06	ABX74940.1
Spodoptera exigua iflavirus 2	polyprotein [Spodoptera exigua iflavirus 2]	2e-06	AFQ98017.1
Acheta domesticus virus	structural polyprotein [Acheta domesticus virus]	3e-06	AAZ16515.1
Ectropis obliqua virus	polyprotein [Ectropis obliqua picorna-like virus]	3e-06	AAQ17044.1
Mouse kobuvirus M-5/USA/2010	polyprotein [Mouse kobuvirus M-5/USA/2010] >gb|AEM05831.1| polyprotein [Mouse kobuvirus M-5/USA/2010]	3e-06	YP_004782207.1
Aichivirus B	VP3 [Aichivirus B]	1e-05	NP_859020.1
Drosophila C virus	capsid polyprotein [Drosophila C virus] >gb|AAC58808.1| capsid polyprotein [Drosophila C virus]	2e-05	NP_044946.1
Equine rhinitis B virus	polyprotein [Equine rhinitis B virus]	3e-05	ADN07629.1
Salivirus A	VP3 [Salivirus NG-J1]	0.0001	YP_003038636.1
Bluegill picornavirus	polyprotein [Bluegill picornavirus] >gb|AFP96991.1| polyprotein [Bluegill picornavirus]	0.0003	YP_006607894.1
Norwalk virus	capsid protein, partial [Norovirus Hu/GI.7/S47/2008/Lilla Edet/Sweden] >gb|AEY77027.1| capsid protein, partial [Norovirus Hu/GI.7/S24/2008/Lilla Edet/Sweden]	0.0004	AEY77025.1
Turdivirus 2	VP3 [Turdivirus 2]	0.0005	YP_003853301.1
Aquamavirus A	VP3 [Seal picornavirus type 1]	0.0008	YP_001497175.1
Lygus lineolaris virus 1	polypeptide [Lygus lineolaris virus 1]	0.001	AEL30247.1
Rosavirus M-7	polyprotein [Rosavirus M-7]	0.002	AEM05832.2
Walrus calicivirus	capsid protein [Walrus calicivirus]	0.002	NP_786921.1
Cricket paralysis virus	structural polyprotein [Cricket paralysis virus] >sp|P13418.2|POLS_CRPVC RecName: Full=Structural polyprotein; Contains: RecName: Full=Capsid protein 1; AltName: Full=CP1; Contains: RecName: Full=Capsid protein 4; AltName: Full=CP4; Contains: RecName: Full=Capsid protein 2; AltName: Full=CP2; Contains: RecName: Full=Capsid protein 3; AltName: Full=CP3 >gb|AAF80999.1| structural polyprotein [crick…	0.003	NP_647482.1
Taura syndrome virus	capsid protein 2 [Taura syndrome virus]	0.003	ACT76399.1
Sacbrood virus	structural protein Vp1, partial [Sacbrood virus] >gb|AFY98902.1| structural protein Vp1, partial [Sacbrood virus]	0.005	AFY98897.1
Sapporo virus	polyprotein [Sapovirus swine/NC-QW270/03/US]	0.023	AAX37314.1
Recovirus Bangladesh/289/2007	VP1 [Recovirus Bangladesh/289/2007]	0.025	AFM93995.1
Vesicular exanthema of swine virus	capsid protein [Reptile calicivirus]	0.043	AAX48220.1
Swine pasivirus 1	VP3 [Swine pasivirus 1]	0.13	YP_006546260.1
Equine rhinitis A virus	P1 [Equine rhinitis A virus]	0.15	AAK52733.1
Chicken calicivirus	polyprotein, partial [Chicken calicivirus]	0.31	AFH89835.1
Ljungan virus	Polyprotein [Ljungan virus]	0.31	ABQ02688.1
Feline calicivirus	capsid protein [Feline calicivirus]	0.32	NP_783311.1
Enterovirus D	polyprotein [Human enterovirus 68]	0.33	BAK08580.1
Bovine enteric calicivirus	capsid protein [Bovine enteric calicivirus]	0.44	ABW80989.1
Enterovirus C	polyprotein [Coxsackievirus A11]	0.51	ABM21503.1
California sea lion sapovirus 2	polyprotein [California sea lion sapovirus 2]	0.8	AEM37580.1
Murine norovirus	capsid protein [Murine norovirus]	0.86	AEA07712.1
Porcine teschovirus	polyprotein [Porcine teschovirus 9]	0.88	AAK12388.1
Bat picornavirus 2	polyprotein [Bat picornavirus 2] >gb|AEM23659.1| polyprotein [Bat picornavirus 2]	1.2	YP_004782529.1
Israeli acute paralysis virus	capsid protein [Israeli acute paralysis virus]	1.2	ACD01376.1
Kashmir bee virus	structural polyprotein [Kashmir bee virus]	1.2	AAR19088.1
Enterovirus B	polyprotein [Echovirus E7]	1.3	AAQ04839.1
European brown hare syndrome virus	putative major capsid protein [European brown hare syndrome virus]	1.3	NP_786903.1
Human parechovirus	polyprotein [Human parechovirus 1]	1.3	ADA79686.1
Rabbit hemorrhagic disease virus	capsid structural protein VP60 [Rabbit hemorrhagic disease virus]	1.3	CAA75623.1
Rhinovirus A	polyprotein [Human rhinovirus A13]	1.3	ACK37373.1
Cadicivirus A	polyprotein P1 [Canine picodicistrovirus]	1.4	AFB77698.1
Canine picornavirus	polyprotein [Canine picornavirus] >gb|AFB78146.1| polyprotein [Canine picornavirus]	1.5	YP_005351240.1
Steller sea lion vesivirus	capsid [Steller sea lion vesivirus]	1.5	ABP88255.1
Seneca valley virus	polyprotein [Seneca valley virus]	1.8	ABX71177.1
Turkey calicivirus	polyprotein [Turkey calicivirus]	2.3	AFH89833.1
Rhinovirus C	polyprotein, partial [Rhinovirus C]	2.8	AET72466.1
Infectious flacherie virus	polyprotein [Infectious flacherie virus]	3.1	ADP24157.1
Mink calicivirus	ORF2 protein [Mink calicivirus] >gb|AFY07855.1| ORF2 protein [Mink calicivirus]	3.5	YP_007111845.1
Avian sapelovirus	VP2 [Avian sapelovirus]	5.9	YP_164822.1
Foot-and-mouth disease virus	polyprotein [Foot-and-mouth disease virus - type A]	7.2	ACM68673.1
RTSV Pro
PLANT
Maize chlorotic dwarf virus	3C-like protease (Maize chlorotic dwarf virus)	3e-47	NP_734455.1
Arracacha virus B	polyprotein [Arracacha virus B]	1.7	AFI74271.1
ANIMAL
Israeli acute paralysis virus	nonstructural polyprotein [Israeli acute paralysis virus]	1e-66	AGF84784.1
Kashmir bee virus	non-structural polyprotein [Kashmir bee virus] >gb|AAP32283.1| non-structural polyprotein [Kashmir bee virus]	9e-61	NP_851403.1
Solenopsis invicta virus-1	nonstructural polyprotein [Solenopsis invicta virus-1] >gb|AAU85375.1| nonstructural polyprotein [Solenopsis invicta virus-1]	9e-42	YP_164440.1
Drosophila C virus	replicase polyprotein [Drosophila C virus] >sp|O36966.1|POLN_DCVEB RecName: Full=Replicase polyprotein; Contains: RecName: Full=Protein 1A; Contains: RecName: Full=Protein 2A; Contains: RecName: Full=Protein 2B; Contains: RecName: Full=Protein 2C; Contains: RecName: Full=Protein 3A; Contains: RecName: Full=Protein 3B; Contains: RecName: Full=3C-like protease; Contains: RecName: Full=RNA-directed …	6e-06	NP_044945.1
Triatoma virus	nonstructural protein precursor [Triatoma virus] >gb|AAF00472.1| nonstructural protein precursor [Triatoma virus]	2e-05	NP_620562.1
Plautia stali intestine virus	nonstructural polyprotein [Plautia stali intestine virus] >dbj|BAA21898.1| nonstructural polyprotein [Plautia stali intestine virus]	0.0001	NP_620555.1
Black queen cell virus	non-structural polyprotein [Black queen cell virus]	0.0002	ABS82427.1
Taura syndrome virus	non-structural polyprotein [Taura syndrome virus]	0.0002	AAT81157.2
Himetobi P virus	nonstructural protein precursor [Himetobi P virus] >dbj|BAA32553.1| nonstructural protein precursor [Himetobi P virus]	0.009	NP_620560.1
Turdivirus 2	3C [Turdivirus 2]	0.014	YP_003853308.1
Rhopalosiphum padi virus	nonstructural polyprotein, partial [Rhopalosiphum padi virus] >gb|AFH02767.1| nonstructural polyprotein, partial [Rhopalosiphum padi virus]	0.031	AFH02766.1
Rosavirus M-7	polyprotein [Rosavirus M-7]	0.096	AEM05832.2
Mud crab dicistrovirus	non-structural polyprotein [Mud crab dicistrovirus] >gb|ADR72923.1| non-structural polyprotein [Mud crab dicistrovirus]	0.1	YP_004063985.1
Aurantiochytrium single-stranded RNA virus 01 (Algae)	polyprotein [Schizochytrium single-stranded RNA virus] >dbj|BAE47143.1| polyprotein [Aurantiochytrium single-stranded RNA virus 01]	0.14	YP_392465.1
Cricket paralysis virus	nonstructural polyprotein [Cricket paralysis virus] >sp|Q9IJX4.1|POLN_CRPVC RecName: Full=Replicase polyprotein; Contains: RecName: Full=Protein 1A; AltName: Full=CrPV-1A; Contains: RecName: Full=Protein 2A; Contains: RecName: Full=Protein 2B; Contains: RecName: Full=Protein 2C; Contains: RecName: Full=Protein 3A; Contains: RecName: Full=Protein 3B; Contains: RecName: Full=3C-like protease; Conta…	0.3	NP_647481.1
Homalodisca coagulata virus-1	nonstructural protein precursor [Homalodisca coagulata virus-1] >gb|ABC55703.1| nonstructural protein precursor [Homalodisca coagulata virus-1]	0.37	YP_610950.1
Turdivirus 3	3C [Turdivirus 3]	0.56	YP_003853319.1
Turkey gallivirus	polyprotein [Turkey gallivirus] >gb|AFO66657.1| polyprotein [Turkey gallivirus]	0.88	YP_006576515.1
Aichivirus A	polyprotein [Aichi virus 1]	1.5	ACQ42267.1
Porcine kobuvirus	3C [Porcine kobuvirus swine/S-1-HUN/2007/Hungary]	5.2	YP_002473943.1
Kobuvirus dog/AN211D/USA/2009	polyprotein [Kobuvirus dog/AN211D/USA/2009]	6.4	AEL19656.1
Kobuvirus sheep/TB3/HUN/2009	polyprotein [Kobuvirus sheep/TB3/HUN/2009]	8.4	ADG03747.2
SMoV CP
PLANT
Black raspberry necrosis virus	viral polyprotein [Black raspberry necrosis virus]	0	CBM42549.1
Chocolate lily virus A	unnamed protein product [Chocolate lily virus A]	1e-17	YP_004940023.1
Satsuma dwarf virus	coat proteins [Satsuma dwarf virus]	2e-13	BAD12076.1
ANIMAL
Norwalk virus	58 kd capsid protein [Norwalk virus] >sp|Q83884.2|CAPSD_NVN68 RecName: Full=Capsid protein VP1; Short=CP; AltName: Full=p59; Contains: RecName: Full=Soluble capsid protein; AltName: Full=Protein 30k; Short=p30 >pdb|1IHM|A Chain A, Crystal Structure Analysis Of Norwalk Virus Capsid >pdb|1IHM|B Chain B, Crystal Structure Analysis Of Norwalk Virus Capsid >pdb|1IHM|C Chain C, Crystal Structure Analys…	8e-160	NP_056821.2
Tulane virus	capsid protein [Tulane virus]	2e-54	ACB38132.1
Mink calicivirus	ORF2 protein [Mink calicivirus] >gb|AFY07855.1| ORF2 protein [Mink calicivirus]	9e-21	YP_007111845.1
Nebovirus	polyprotein [Nebovirus Bo/M3641/2011/HUN]	2e-20	AFO37806.1
Newbury-1 virus	polyprotein [Newbury agent 1] >sp|Q288N7.1|POLG_BECN1 RecName: Full=Genome polyprotein; Contains: RecName: Full=Protein p34; Contains: RecName: Full=NTPase; AltName: Full=p37; Contains: RecName: Full=Protein p30; Contains: RecName: Full=Viral genome-linked protein; AltName: Full=VPg; AltName: Full=p8; Contains: RecName: Full=3C-like protease; Short=3CLpro; AltName: Full=p20; Contains: RecName: Fu…	2e-20	YP_529550.1
Feline calicivirus	capsid precursor [Feline calicivirus]	3e-19	AET95899.1
Walrus calicivirus	capsid protein [Walrus calicivirus]	1e-17	NP_786921.1
Vesicular exanthema of swine virus	capsid [San Miguel sea lion virus]	2e-17	AAC57040.1
Steller sea lion vesivirus	capsid [Steller sea lion vesivirus]	3e-17	ABP88255.1
Canine calicivirus	capsid protein [Canine calicivirus]	5e-17	NP_786912.1
European brown hare syndrome virus	capsid protein [European brown hare syndrome virus]	3e-16	CAL64025.1
Rabbit hemorrhagic disease virus	capsid protein [Rabbit calicivirus]	7e-16	ADP88753.1
Secalivirus	capsid, partial [Secalivirus]	0.0002	AFR11844.1
Sapporo virus	capsid [Sapovirus Hu/K1/JPN]	0.0003	ABW16847.1
Equine rhinitis B virus	polyprotein [Equine rhinitis B virus]	0.37	AAT99273.1
Porcine teschovirus	polyprotein [Porcine teschovirus 4]	0.55	ACT66680.1
Enterovirus A	P1, partial [Coxsackievirus A16]	0.64	AFP89678.1
Enterovirus B	capsid polyprotein [Human echovirus 1 (strain Bryson)]	0.71	AAG17621.1
Rhinovirus B	polyprotein [Rhinovirus B]	0.86	AFD64771.1
Enterovirus J	1C (VP3) [Enterovirus J]	1.2	YP_001718578.1
Rhinovirus C	polyprotein [Rhinovirus C]	1.2	AFS30772.1
Feline picornavirus	polyprotein [Feline picornavirus]	1.4	AET06138.1
Enterovirus C	capsid polyprotein [Human poliovirus 1]	1.8	ABQ52107.1
Enterovirus E	capsid protein [Enterovirus E]	2.8	CAA55913.1
Hepatitis A virus	1C VP3 mature peptide [Hepatitis A virus]	2.8	NP_740551.1
Rhinolophus affinis picornavirus 1	polyprotein, partial [Rhinolophus affinis picornavirus 1]	3.6	AFK85013.1
Simian sapelovirus	polyprotein [Simian sapelovirus 1] >gb|AAL57904.1| polyprotein [Simian sapelovirus 1]	3.6	NP_758809.1
Foot-and-mouth disease virus	capsid protein (VP3), partial [Foot-and-mouth disease virus]	4	AAA42592.1
Canine picornavirus	VP3 [Canine picornavirus]	5	YP_005352647.1
Bat picornavirus 3	polyprotein [Bat picornavirus 3]	8.8	AEM23662.1
SMoV Pro
PLANT
Black raspberry necrosis virus	protease [Black raspberry necrosis virus]	5e-43	YP_654560.1
ANIMAL
Human cosavirus B	3C [Human cosavirus B]	9e-90	YP_002956117.1
Human cosavirus E	3C [Human cosavirus E]	4e-84	YP_002956086.1
Human cosavirus D	3C [Human cosavirus D]	6e-81	YP_002956128.1
Human cosavirus F	polyprotein [Human cosavirus F]	4e-72	AFJ04539.1
Encephalomyocarditis virus	protein 3C [Encephalomyocarditis virus]	1e-17	NP_740410.1
Boone cardiovirus	polyprotein [Boone cardiovirus]	1e-16	AGC69961.1
Theilovirus	polyprotein [Saffold virus]	3e-14	ADO20359.1
Porcine teschovirus	polyprotein [Porcine teschovirus 5]	2e-10	ACT66681.1
Bovine rhinitis B virus	polyprotein [Bovine rhinitis A virus]	8e-09	AFC40221.1
Equine rhinitis A virus	polyprotein [Equine rhinitis A virus]	5e-08	AFY10938.1
unclassified	polyprotein [Mouse Mosavirus]	2e-06	AEM05833.1
Equine rhinitis B virus	polyprotein [Equine rhinitis B virus 2]	3e-06	AAK91591.1
Foot-and-mouth disease virus	polyprotein [Foot-and-mouth disease virus - type SAT 2]	6e-06	CAB62902.1
Ovine hungarovirus OHUV1/2009/HUN	polyprotein [Ovine hungarovirus OHUV1/2009/HUN]	6e-06	ADO85550.2
Salivirus A	3C [Salivirus NG-J1]	3e-05	YP_003038643.1
Seneca valley virus	polyprotein [Seneca valley virus]	0.001	AGM16001.1
Hepatitis A virus	unnamed protein product [Hepatitis A virus]	0.001	CAA53024.1
Melegrivirus A	polyprotein [Turkey hepatitis virus 2993D] >gb|ADN94255.1| polyprotein [Turkey hepatitis virus 2993D]	0.19	YP_007974220.1
Slow bee paralysis virus	polyprotein [Slow bee paralysis virus]	0.23	ADI46683.1
Bat picornavirus 2	3C [Bat picornavirus 2]	0.72	YP_004782568.1
Swine pasivirus 1	polyprotein [Parechovirus-like virus PLV-CHN]	0.94	AFV31450.1
Avian encephalomyelitis virus	putative 3C [Avian encephalomyelitis virus]	1.2	NP_705604.1
California sea lion sapelovirus 1	polyprotein [California sea lion sapelovirus 1]	1.3	AEM37584.1
Bat picornavirus 1	3C [Bat picornavirus 1]	4.7	YP_004782554.1
Aphid lethal paralysis virus	ORF1 [Aphid lethal paralysis virus]	6.7	AFU81560.1
Pigeon picornavirus B	3C [Pigeon picornavirus B]	6.9	YP_004564618.1
ToTV CP
PLANT
unclassified	polyprotein [Tomato apex necrosis virus]	0	ABK33526.1
Tomato marchitez virus	polyprotein [Tomato marchitez virus]	0	YP_001976149.1
Tomato chocolate virus	polyprotein [Tomato chocolate virus]	0	ACU01026.1
Rice tungro spherical virus	polyprotein [Rice tungro spherical virus]	1.3	NP_042507.1
ANIMAL
Parechovirus	VP0 protein [Sebokele virus 1]	4e-70	YP_008119835.1
Ljungan virus	Capsid protein VP0 [Ljungan virus]	2e-67	NP_705874.1
Swine pasivirus 1	polyprotein [Swine pasivirus 1] >gb|AFN70966.1| polyprotein [Swine pasivirus 1]	2e-45	YP_006543639.1
Duck hepatitis A virus	polyprotein [Duck hepatitis A virus 1]	8e-33	AEP84768.1
Turkey avisivirus	polyprotein [Turkey avisivirus]	9e-20	AGH06056.1
Bluegill picornavirus	VP0 capsid protein [Bluegill picornavirus]	4e-14	YP_006628177.1
Porcine kobuvirus	polyprotein [Porcine kobuvirus]	4e-05	AFP28805.1
Hepatitis A virus	1B VP2 mature peptide [Hepatitis A virus]	0.0002	NP_740550.1
Aphid lethal paralysis virus	capsid protein precursor, partial [Aphid lethal paralysis virus]	0.0003	AGF84787.1
Turdivirus 3	polyprotein [Turdivirus 3]	0.0004	ADL38962.1
Aichivirus C	polyprotein [Kobuvirus pig/JY-2010a/CHN]	0.0009	ADB45876.1
Ovine hungarovirus OHUV1/2009/HUN	polyprotein [Ovine hungarovirus OHUV1/2009/HUN]	0.001	ADO85550.2
Simian sapelovirus	polyprotein [Simian sapelovirus 1] >gb|AAL57904.1| polyprotein [Simian sapelovirus 1]	0.001	NP_758809.1
Salivirus A	polyprotein [Salivirus A]	0.002	ADL27742.1
Homalodisca coagulata virus-1	capsid polyprotein [Homalodisca coagulata virus-1]	0.003	ABC25489.1
Bovine hungarovirus	polyprotein [Bovine hungarovirus] >gb|AFS33288.1| polyprotein [Bovine hungarovirus]	0.007	YP_006792625.1
Triatoma virus	capsid protein precursor [Triatoma virus] >gb|AAF00473.1| capsid protein precursor [Triatoma virus]	0.008	NP_620563.1
Canine picornavirus	VP2 [Canine picornavirus]	0.012	YP_005352646.1
Turdivirus 2	polyprotein [Turdivirus 2]	0.022	ADL38960.1
Mouse kobuvirus M-5/USA/2010	polyprotein [Mouse kobuvirus M-5/USA/2010] >gb|AEM05831.1| polyprotein [Mouse kobuvirus M-5/USA/2010]	0.027	YP_004782207.1
Aichivirus A	polyprotein [Canine kobuvirus 1]	0.029	AGH29114.1
Bat picornavirus 3	polyprotein [Bat picornavirus 3] >gb|AEM23661.1| polyprotein [Bat picornavirus 3]	0.034	YP_004782204.1
Avian encephalomyelitis virus	aev polyprotein [Avian encephalomyelitis virus] >sp|Q9YLS4.1|POLG_AEVCA RecName: Full=Genome polyprotein; Contains: RecName: Full=Protein VP0; AltName: Full=VP4-VP2; Contains: RecName: Full=Protein VP4; AltName: Full=P1A; AltName: Full=Virion protein 4; Contains: RecName: Full=Protein VP2; AltName: Full=P1B; AltName: Full=Virion protein 2; Contains: RecName: Full=Protein VP3; AltName: Full=P1C; A…	0.039	NP_653151.1
Nilaparvata lugens honeydew virus-2	polyprotein [Nilaparvata lugens honeydew virus-2] >dbj|BAN57352.1| polyprotein [Nilaparvata lugens honeydew virus-2]	0.043	YP_008130309.1
Rhinovirus B	1B (VP2) [Human rhinovirus B14]	0.043	NP_740516.1
Himetobi P virus	capsid protein precursor [Himetobi P virus]	0.046	BAD27585.1
Encephalomyocarditis virus	polyprotein [Encephalomyocarditis virus]	0.057	CAE84566.1
Seneca valley virus	polyprotein [Seneca valley virus]	0.078	AGM16001.1
Aichivirus B	hypothetical protein [Aichivirus B] >dbj|BAC23066.1| unnamed protein product [Aichivirus B]	0.092	NP_740257.1
Pigeon picornavirus B	polyprotein [Pigeon picornavirus B] >emb|CBY02483.1| polyprotein [Pigeon picornavirus B]	0.11	YP_004564600.1
Rhinovirus B	polyprotein [Human rhinovirus B14]	0.13	AAA45758.1
Equine rhinitis B virus	polyprotein [Equine rhinitis B virus]	0.18	ADN07626.1
Foot-and-mouth disease virus	capsid [Foot-and-mouth disease virus - type Asia 1]	0.19	CAB62904.1
Nilaparvata lugens honeydew virus-1	polyprotein [Nilaparvata lugens honeydew virus-1]	0.26	BAN19725.1
Theilovirus	capsid protein VP2 [Saffold virus]	0.45	YP_001816883.1
Feline picornavirus	polyprotein [Feline picornavirus]	0.82	AET06139.1
Nilaparvata lugens honeydew virus-3	polyprotein [Nilaparvata lugens honeydew virus-3] >dbj|BAN57353.1| polyprotein [Nilaparvata lugens honeydew virus-3]	0.86	YP_008130310.1
Bat picornavirus 2	polyprotein [Bat picornavirus 2] >gb|AEM23659.1| polyprotein [Bat picornavirus 2]	0.92	YP_004782529.1
Bat kobuvirus TM001k	P1 [Bat kobuvirus TM001k]	1.1	ADI48257.1
Rhopalosiphum padi virus	structural polyprotein [Rhopalosiphum padi virus]	1.1	ABX74940.1
Rosavirus M-7	polyprotein [Rosavirus M-7]	1.1	AEM05832.2
Bovine rhinitis B virus	BRV2 polyprotein [Bovine rhinitis B virus] >gb|ACA05181.1| BRV2 polyprotein [Bovine rhinitis B virus]	1.5	YP_001686841.1
Enterovirus A	polyprotein [Coxsackievirus A16]	4.4	AGK85257.1
Enterovirus G	polyprotein [Enterovirus G]	4.8	AFQ55916.1
Rhinovirus A	polyprotein [Rhinovirus A]	5.8	AER92580.1
Bat picornavirus 1	polyprotein [Bat picornavirus 1]	7	AEM23658.1
Acute bee paralysis virus	capsid polyprotein [Acute bee paralysis virus]	8.1	AAL05915.1
Kashmir bee virus	structural polyprotein [Kashmir bee virus]	8.1	AAR19088.1
Porcine teschovirus	polyprotein [Porcine teschovirus 7]	9.2	AAK12386.1
Deformed wing virus	polyprotein [Kakugo virus] >dbj|BAF32609.1| polyprotein [Kakugo virus]	9.5	BAF32608.1
BBWV1 CP
PLANT
Broad bean wilt virus 2	coat protein [Broad bean wilt virus 2]	0	BAD88726.1
Gentian mosaic virus	polyprotein containing large and small coat proteins [Gentian mosaic virus]	0	BAD99109.1
Cucurbit mild mosaic virus	114 kDa polyprotein [Cucurbit mild mosaic virus]	0	ACK76424.1
Squash mosaic virus	polyprotein [Squash mosaic virus] >dbj|BAB62140.1| polyprotein [Squash mosaic virus]	3e-23	NP_620658.1
Broad bean true mosaic virus	polyprotein [Broad bean true mosaic virus]	3e-19	ADI60055.1
Cowpea severe mosaic virus	polyprotein [Cowpea severe mosaic virus]	1e-18	AEN79437.1
Bean pod mottle virus	large polyprotein 2 [Bean pod mottle virus]	2e-18	AAM73719.1
Red clover mottle virus	polyprotein [Red clover mottle virus]	4e-14	ACS12872.1
Turnip ringspot virus	polyprotein [Turnip ringspot virus]	8e-14	ADZ54705.1
Red clover mottle virus	large capsid protein [Red clover mottle virus]	5e-09	NP_733992.1
Radish mosaic virus	polyprotein [Radish mosaic virus]	7e-09	ABS32294.1
Andean potato mottle virus	coat protein, partial [Andean potato mottle virus]	8e-05	AAA42420.1
Cowpea mosaic virus	unnamed protein product [Cowpea mosaic virus]	4e-09	CAA25317.1
BBWV1 Pro
PLANT
Broad bean wilt virus 2	protease [Broad bean wilt virus 2]	5e-81	NP_733961.1
Gentian mosaic virus	polyprotein [Gentian mosaic virus]	1e-72	BAD99001.1
Cucurbit mild mosaic virus	205 kDa polyprotein [Cucurbit mild mosaic virus]	9e-58	ACK76423.1
Broad bean true mosaic virus	polyprotein [Broad bean true mosaic virus]	1e-30	ADI60054.1
Bean pod mottle virus	protease [Bean pod mottle virus]	5e-30	NP_734069.1
Squash mosaic virus	protease [Squash mosaic virus]	8e-29	NP_734011.1
Red clover mottle virus	protease [Red clover mottle virus]	7e-28	NP_734029.1
Cowpea severe mosaic virus	polyprotein, partial [Cowpea severe mosaic virus] >gb|AEZ06616.1| polyprotein, partial [Cowpea severe mosaic virus] >gb|AEZ06617.1| polyprotein, partial [Cowpea severe mosaic virus] >gb|AEZ06619.1| polyprotein, partial [Cowpea severe mosaic virus] >gb|AEZ06620.1| polyprotein, partial [Cowpea severe mosaic virus] >gb|AEZ06621.1| polyprotein, partial [Cowpea severe mosaic virus] >gb|AEZ06622.1| pol…	2e-26	AEZ06614.1
Turnip ringspot virus	polyprotein [Turnip ringspot virus]	2e-24	ADZ54704.1
Grapevine Bulgarian latent virus	polyprotein segment 1 [Grapevine Bulgarian latent virus] >emb|CBL43395.1| polyprotein segment 1 [Grapevine Bulgarian latent virus]	3e-09	YP_004429248.1
Raspberry ringspot virus	polyprotein 1 [Raspberry ringspot virus] >sp|Q6W8W4.1|POL1_RRVC RecName: Full=RNA1 polyprotein; AltName: Full=P1; Contains: RecName: Full=P1A protein; Short=1A; AltName: Full=Protease cofactor; Contains: RecName: Full=Putative ATP-dependent helicase; AltName: Full=1B; AltName: Full=Membrane-binding protein; AltName: Full=NTP-binding protein; Short=NTB; Contains: RecName: Full=Viral genome-linked …	2e-08	NP_944487.1
Tobacco ringspot virus	RNA1 polyprotein [Tobacco ringspot virus] >sp|Q88893.1|POL1_TRSVB RecName: Full=RNA1 polyprotein; AltName: Full=P1; Contains: RecName: Full=P1A protein; Short=1A; AltName: Full=Protease cofactor; Contains: RecName: Full=Putative ATP-dependent helicase; AltName: Full=1B; AltName: Full=Membrane-binding protein; AltName: Full=NTP-binding protein; Short=NTB; Contains: RecName: Full=Viral genome-linke…	5e-07	NP_919040.1
Blackcurrant reversion virus	polyprotein [Blackcurrant reversion virus] >sp|Q8V5E0.1|POL1_BRAV RecName: Full=RNA1 polyprotein; AltName: Full=P1; Contains: RecName: Full=Protein X1; Contains: RecName: Full=Protein X2; Contains: RecName: Full=Putative ATP-dependent helicase; AltName: Full=Membrane-binding protein; AltName: Full=NTP-binding protein; Short=NTB; Contains: RecName: Full=Viral genome-linked protein; AltName: Full=V…	9e-05	NP_612604.1
Cherry leaf roll virus	polyprotein [Cherry leaf roll virus]	0.0002	ACZ65483.1
Artichoke yellow ringspot virus	polyprotein [Artichoke yellow ringspot virus]	0.0002	CAJ33467.2
Tomato white ringspot virus	polyprotein [Tomato white ringspot virus]	0.0006	ABM65095.1
Melon mild mottle virus	polyprotein [Melon mild mottle virus]	0.001	BAJ16223.1
Beet ringspot virus	cysteine protease [Beet ringspot virus]	0.077	NP_734034.2
Grapevine chrome mosaic virus	cysteine protease [Grapevine chrome mosaic virus]	1.6	YP_002000613.1
Tomato black ring virus	polyprotein [Tomato black ring virus] >sp|Q8B8X3.1|POL1_TBRVM RecName: Full=RNA1 polyprotein; AltName: Full=P1; Contains: RecName: Full=P1A protein; Short=1A; AltName: Full=protease cofactor; Contains: RecName: Full=Putative ATP-dependent helicase; AltName: Full=1B; AltName: Full=NTP-binding protein; Short=NTB; AltName: Full=membrane-binding protein; Contains: RecName: Full=Viral genome-linked pr…	2	NP_958814.1
ANIMAL
Ljungan virus	Picornain 3C [Ljungan virus]	3e-54	NP_705883.1
Sebokele virus 1	3C protein [Sebokele virus 1]	8e-50	YP_008119843.1
Swine pasivirus 1	3C [Swine pasivirus 1]	1e-23	YP_006546268.1
Duck hepatitis A virus	polyprotein [Duck hepatitis A virus 3]	1e-15	ACY72332.1
Aquamavirus A	3C [Seal picornavirus type 1]	3e-13	YP_001497183.1
Turkey avisivirus	polyprotein [Turkey avisivirus]	2e-09	AGH06056.1
Encephalomyocarditis virus	polyprotein [Encephalomyocarditis virus]	0.49	AGU38152.1
Bluegill picornavirus	3C proteinase [Bluegill picornavirus]	0.66	YP_006628186.1
unclassified	polyprotein [Mouse Mosavirus]	1.2	AEM05833.1
Equine rhinitis B virus	polyprotein [Equine rhinitis B virus 1] >emb|CAA65615.1| polyprotein [Equine rhinitis B virus 1]	2.2	NP_653077.1
Enterovirus J	polyprotein [Enterovirus J] >gb|AAL68561.2|AF414373_1 polyprotein [Enterovirus J]	3.6	YP_003358790.1
Turdivirus 2	polyprotein [Turdivirus 2]	4.1	ADL38960.1
Enterovirus A	polyprotein [Simian enterovirus 46]	4.9	AAL69636.2
Enterovirus C	polyprotein [Coxsackievirus A13]	5.7	ABM21514.1
Enterovirus B	polyprotein [Enterovirus B]	7.6	AGP25524.1
Turdivirus 3	polyprotein [Turdivirus 3] >gb|ADL38961.1| polyprotein [Turdivirus 3]	7.8	YP_003853287.1
Kunsagivirus 1	polyprotein [Kunsagivirus 1]	8.6	AGO59796.1
Kobuvirus sheep/TB3/HUN/2009	polyprotein [Kobuvirus sheep/TB3/HUN/2009]	9.8	ADG03747.2
Enterovirus G	polyprotein [Porcine enterovirus 9]	9.4	ADW78250.1
CPMV CP
PLANT
Broad bean stain virus	polyprotein [Broad bean stain virus]	0	ACM79011.2
Red clover mottle virus	polyprotein [Red clover mottle virus]	0	ACS12872.1
Bean pod mottle virus	small polyprotein 2 [Bean pod mottle virus]	9e-179	AAW69771.1
Broad bean true mosaic virus	polyprotein [Broad bean true mosaic virus]	1e-178	ADI60055.1
Squash mosaic virus	polyprotein 2 [Squash mosaic virus]	7e-176	AEP68801.1
Cowpea severe mosaic virus	polyprotein [Cowpea severe mosaic virus]	4e-168	AEN79437.1
Radish mosaic virus	polyprotein [Radish mosaic virus]	3e-152	ABS32294.1
Andean potato mottle virus	capsid protein, partial [Andean potato mottle virus] >prf||1909345A major coat protein	5e-71	AAA42423.1
Bean rugose mosaic virus	polyprotein M [Bean rugose mosaic virus]	3e-25	AAL40854.1
Andean potato mottle virus	coat protein, partial [Andean potato mottle virus]	2e-18	AAA42420.1
Broad bean wilt virus 1	polyprotein [Broad bean wilt virus 1]	2e-11	BAC76800.1
Mikania micrantha mosaic virus	polyprotein 2 [Mikania micrantha mosaic virus]	8e-10	ACE00419.1
Broad bean wilt virus 2	polyprotein [Broad bean wilt virus 2]	8e-10	AGM38173.1
Gentian mosaic virus	polyprotein containing large and small coat proteins [Gentian mosaic virus]	2e-09	BAD99109.1
CPMV Pro
PLANT
Red clover mottle virus	protease [Red clover mottle virus]	2e-76	NP_734029.1
Broad bean true mosaic virus	polyprotein [Broad bean true mosaic virus]	2e-72	ADI60054.1
Bean pod mottle virus	protease [Bean pod mottle virus]	2e-69	NP_734069.1
Squash mosaic virus	protease [Squash mosaic virus]	2e-66	NP_734011.1
Turnip ringspot virus	polyprotein [Turnip ringspot virus]	4e-48	ACX53646.1
Radish mosaic virus	polyprotein [Radish mosaic virus]	4e-45	ACE06773.1
Broad bean wilt virus 1	cysteine protease [Broad bean wilt virus 1]	2e-24	NP_951029.1
Broad bean wilt virus 2	protease [Broad bean wilt virus 2]	1e-20	NP_733961.1
Cucurbit mild mosaic virus	205 kDa polyprotein [Cucurbit mild mosaic virus]	3e-20	ACK76423.1
Gentian mosaic virus	polyprotein 1 [Mikania micrantha mosaic virus]	2e-18	ACI22650.1
Melon mild mottle virus	polyprotein [Melon mild mottle virus]	1e-08	BAJ16223.1
Artichoke yellow ringspot virus	polyprotein [Artichoke yellow ringspot virus]	1e-07	CAJ33467.2
Tomato white ringspot virus	polyprotein [Tomato white ringspot virus]	2e-07	ABM65095.1
Tobacco ringspot virus	RNA1 polyprotein [Tobacco ringspot virus] >sp|Q88893.1|POL1_TRSVB RecName: Full=RNA1 polyprotein; AltName: Full=P1; Contains: RecName: Full=P1A protein; Short=1A; AltName: Full=Protease cofactor; Contains: RecName: Full=Putative ATP-dependent helicase; AltName: Full=1B; AltName: Full=Membrane-binding protein; AltName: Full=NTP-binding protein; Short=NTB; Contains: RecName: Full=Viral genome-linke…	4e-07	NP_919040.1
Beet ringspot virus	cysteine protease [Beet ringspot virus]	2e-05	NP_734034.2
Tomato ringspot virus	cysteine protease [Tomato ringspot virus]	4e-05	NP_734006.2
Grapevine chrome mosaic virus	cysteine protease [Grapevine chrome mosaic virus]	0.0007	YP_002000613.1
Cherry leaf roll virus	polyprotein 1 [Cherry leaf roll virus] >emb|CCA64538.1| polyprotein 1 [Cherry leaf roll virus]	0.0009	YP_004382746.1
Arabis mosaic virus	cysteine protease [Arabis mosaic virus]	0.001	YP_054442.1
Grapevine fanleaf virus	polyprotein [Grapevine fanleaf virus]	0.001	ACZ58632.1
Tomato black ring virus	Pro [Tomato black ring virus]	0.001	NP_958840.1
Grapevine deformation virus	proteinase [Grapevine deformation virus]	0.003	YP_006347731.1
Cycas necrotic stunt virus	polyprotein 1, partial [Cycas necrotic stunt virus]	0.004	AEN25475.1
Blackcurrant reversion virus	cysteine protease [Blackcurrant reversion virus]	0.019	NP_734044.1
Raspberry ringspot virus	polyprotein 1 [Raspberry ringspot virus] >sp|Q6W8W4.1|POL1_RRVC RecName: Full=RNA1 polyprotein; AltName: Full=P1; Contains: RecName: Full=P1A protein; Short=1A; AltName: Full=Protease cofactor; Contains: RecName: Full=Putative ATP-dependent helicase; AltName: Full=1B; AltName: Full=Membrane-binding protein; AltName: Full=NTP-binding protein; Short=NTB; Contains: RecName: Full=Viral genome-linked …	0.14	NP_944487.1
Grapevine Anatolian ringspot virus	polyprotein p1 [Grapevine Anatolian ringspot virus] >emb|CCG47847.1| polyprotein p1 [Grapevine Anatolian ringspot virus]	0.46	YP_006576510.1
ANIMAL
Turkey avisivirus	polyprotein [Turkey avisivirus]	4e-26	AGF33849.1
Human parechovirus	polyprotein [Human parechovirus 1]	2e-17	CAQ76820.1
Ljungan virus	Picornain 3C [Ljungan virus]	2e-16	NP_705883.1
Sebokele virus 1	3C protein [Sebokele virus 1]	5e-15	YP_008119843.1
Swine pasivirus 1	3C [Swine pasivirus 1]	9e-13	YP_006546268.1
Aquamavirus A	3C [Seal picornavirus type 1]	2e-06	YP_001497183.1
Enterovirus B	3C [Enterovirus B]	0.0001	NP_740546.1
Enterovirus J	3C [Enterovirus J]	0.0005	YP_003359175.1
Enterovirus H	putative 3C [Enterovirus H]	0.001	NP_714938.1
Rhinovirus C	3C [Rhinovirus C]	0.002	YP_001552441.1
Enterovirus J	polyprotein [Enterovirus J]	0.003	ACJ66736.1
Rhinovirus A	hypothetical protein HRV89gp1 [Rhinovirus A] >sp|P07210.3|POLG_HRV8A RecName: Full=Genome polyprotein; Contains: RecName: Full=Protein VP0; AltName: Full=VP4-VP2; Contains: RecName: Full=Protein VP4; AltName: Full=P1A; AltName: Full=Virion protein 4; Contains: RecName: Full=Protein VP2; AltName: Full=P1B; AltName: Full=Virion protein 2; Contains: RecName: Full=Protein VP3; AltName: Full=P1C; AltN…	0.014	NP_042288.1
Enterovirus F	polyprotein [Enterovirus F]	0.014	AAZ73369.1
Enterovirus G	3C (picornain) [Enterovirus G]	0.023	NP_758539.1
Enterovirus A	3C [Enterovirus A]	0.023	NP_740535.1
Enterovirus C	3C proteinase precursor [Human coxsackievirus A24]	0.023	ACA53459.1
Porcine teschovirus	3C protein [Porcine teschovirus]	0.038	NP_740358.1
Avian sapelovirus	3C [Avian sapelovirus]	0.083	YP_164830.1
Enterovirus E	polyprotein [Enterovirus E]	0.089	AAZ73367.1
Cosavirus A	3C [Human cosavirus D]	0.17	YP_002956128.1
Equine rhinitis B virus	3C (proteinase) [Equine rhinitis B virus 1]	0.2	NP_740371.1
Simian sapelovirus	3C [Simian sapelovirus 1]	0.21	NP_937978.1
Encephalomyocarditis virus	complete viral protein [Encephalomyocarditis virus]	0.4	CAA60776.1
Seneca valley virus	polyprotein [Seneca valley virus]	0.54	AGM16001.1
Aichivirus A	3C [Aichi virus 1]	1	NP_740443.1
Enterovirus D	polyprotein [Enterovirus D] >sp|P32537.4|POLG_HE701 RecName: Full=Genome polyprotein; Contains: RecName: Full=Protein VP0; AltName: Full=VP4-VP2; Contains: RecName: Full=Protein VP4; AltName: Full=P1A; AltName: Full=Virion protein 4; Contains: RecName: Full=Protein VP2; AltName: Full=P1B; AltName: Full=Virion protein 2; Contains: RecName: Full=Protein VP3; AltName: Full=P1C; AltName: Full=Virion …	1.3	NP_040760.1
Salivirus A	polyprotein [Salivirus A]	1.3	ADL27742.1
Theilovirus	polyprotein [Rat theilovirus 1]	1.8	ACD67870.1
Salivirus CH	polyprotein [Salivirus CH]	3.2	AEX38455.1
Turkey gallivirus	polyprotein [Turkey gallivirus] >gb|AFO66657.1| polyprotein [Turkey gallivirus]	3.2	YP_006576515.1
Equine rhinitis A virus	3C (proteinase) [Equine rhinitis A virus]	3.6	NP_740382.1
Rhinovirus B	polyprotein [Human rhinovirus B14]	4.3	AAA45758.1
TRSV CP
PLANT
Grapevine fanleaf virus	coat protein [Grapevine fanleaf virus]	3e-44	AAR24857.1
Tomato ringspot virus	coat protein, partial [Tomato ringspot virus]	4e-44	AAD10498.1
Arabis mosaic virus	polyprotein [Arabis mosaic virus]	6e-44	BAA00982.1
Olive latent ringspot virus	polyprotein [Olive latent ringspot virus]	9e-44	CAB90217.1
Melon mild mottle virus	polyprotein [Melon mild mottle virus]	3e-40	BAJ16224.1
Raspberry ringspot virus	putative coat protein [Raspberry ringspot virus]	4e-38	AAF21985.1
Blueberry latent spherical virus	polyprotein [Blueberry latent spherical virus]	9e-34	BAL04701.1
Blackcurrant reversion virus	capsid protein [Blackcurrant reversion virus]	1e-33	NP_733982.2
Tomato black ring virus	coat protein [Tomato black ring virus]	5e-32	NP_758856.1
Grapevine chrome mosaic virus	coat protein [grapevine chrome mosaic virus]	5e-29	NP_734052.1
Cycas necrotic stunt virus	coat protein [Cycas necrotic stunt virus]	9e-20	BAE93234.1
Cherry leaf roll virus	polyprotein 2 [Cherry leaf roll virus] >emb|CCA64539.1| polyprotein 2 [Cherry leaf roll virus]	1e-18	YP_004382747.1
Grapevine deformation virus	coat protein, partial [Grapevine deformation virus]	5e-16	AAP68799.1
Grapevine Anatolian ringspot virus	viral coat protein [Grapevine Anatolian ringspot virus]	7e-11	AAO62576.1
ANIMAL
Feline calicivirus	major capsid protein [Feline calicivirus]	3e-36	AAD47337.1
Turkey calicivirus	polyprotein [Turkey calicivirus]	2e-35	AFH89833.1
Chicken calicivirus	polyprotein, partial [Chicken calicivirus]	8e-35	AFH89835.1
Mink calicivirus	ORF2 protein [Mink calicivirus] >gb|AFY07855.1| ORF2 protein [Mink calicivirus]	3e-34	YP_007111845.1
Vesicular exanthema of swine virus	capsid protein [Reptile calicivirus]	1e-31	AAX48221.1
Canine vesivirus	capsid protein [Canine vesivirus]	3e-31	AFI58321.1
Steller sea lion vesivirus	capsid [Steller sea lion vesivirus] >gb|ABP88258.1| capsid [Steller sea lion vesivirus]	3e-31	YP_002004565.1
Bovine enteric calicivirus	capsid protein [Bovine enteric calicivirus]	2e-30	ACO24944.1
Nebovirus Bo/M3641/2011/HUN	polyprotein [Nebovirus Bo/M3641/2011/HUN]	3e-29	AFO37806.1
Newbury-1 virus	polyprotein [Newbury agent 1] >sp|Q288N7.1|POLG_BECN1 RecName: Full=Genome polyprotein; Contains: RecName: Full=Protein p34; Contains: RecName: Full=NTPase; AltName: Full=p37; Contains: RecName: Full=Protein p30; Contains: RecName: Full=Viral genome-linked protein; AltName: Full=VPg; AltName: Full=p8; Contains: RecName: Full=3C-like protease; Short=3CLpro; AltName: Full=p20; Contains: RecName: Fu…	4e-29	YP_529550.1
Rabbit hemorrhagic disease virus	capsid protein [Rabbit hemorrhagic disease virus]	2e-27	ABU90761.1
European brown hare syndrome virus	capsid protein [European brown hare syndrome virus]	1e-26	CAL64025.1
Murine norovirus	capsid protein VP1 [Murine norovirus 1] >gb|ABB90154.1| capsid protein [Murine norovirus 1] >gb|ABU55559.1| capsid protein [Murine norovirus 1]	2e-21	YP_720002.1
Recovirus Bangladesh/289/2007	VP1 [Recovirus Bangladesh/289/2007]	9e-14	AFM93995.1
Foot-and-mouth disease virus	polyprotein [Foot-and-mouth disease virus - type Asia 1]	0.0009	AAP60035.1
Aichivirus A	polyprotein [Aichi virus 1]	0.011	ABV59102.2
Rhinovirus B	polyprotein [Human rhinovirus B99]	0.016	ACK37430.1
Enterovirus C	polyprotein [Human poliovirus 1]	0.052	AGS09856.1
California sea lion sapelovirus 1	polyprotein [California sea lion sapelovirus 1]	0.078	AEM37584.1
Enterovirus H	putative VP3 [Enterovirus H]	0.53	NP_714931.1
Enterovirus B	polyprotein [Human enterovirus 101]	0.76	AAX47044.1
Equine rhinitis A virus	P1 [Equine rhinitis A virus]	1.3	AAK52733.1
Varroa destructor virus-1	polyprotein [Varroa destructor virus-1]	2.6	AEM63700.1
Deformed wing virus	polyprotein [Deformed wing virus]	2.9	ADL66816.1
Kakugo virus	polyprotein [Kakugo virus]	4.4	BAF32606.1
Enterovirus E	VP3 [Enterovirus E]	4.9	NP_740447.1
Encephalomyocarditis virus	polyprotein [Encephalomyocarditis virus]	7.8	AGU38152.1
TRSV Pro
PLANT
Cycas necrotic stunt virus	cysteine protease [Cycas necrotic stunt virus]	2e-11	NP_734016.2
Arabis mosaic virus	polyprotein P1-II [Arabis mosaic virus]	0.004	ADJ39330.1
Artichoke yellow ringspot virus	polyprotein [Artichoke yellow ringspot virus]	7e-08	CAJ33467.2
Bean pod mottle virus	polyprotein [Bean pod mottle virus]	0.019	ABA18806.1
Beet ringspot virus	cysteine protease [Beet ringspot virus]	1e-08	NP_734034.2
Blackcurrant reversion virus	cysteine protease [Blackcurrant reversion virus]	7e-05	NP_734044.1
Broad bean true mosaic virus	polyprotein [Broad bean true mosaic virus]	2e-11	ADI60054.1
Broad bean wilt virus 1	cysteine protease [Broad bean wilt virus 1]	1e-07	NP_951029.1
Broad bean wilt virus 2	protease [Broad bean wilt virus 2]	8e-06	NP_733961.1
Cowpea mosaic virus	protease [Cowpea mosaic virus]	2e-07	NP_734056.1
Cowpea severe mosaic virus	polyprotein, partial [Cowpea severe mosaic virus]	8e-08	AEZ06618.1
Gentian mosaic virus	unnamed protein product [Mikania micrantha mosaic virus] >gb|ABX83032.1| polyprotein [Mikania micrantha mosaic virus]	0.31	YP_002158824.1
Grapevine Anatolian ringspot virus	polyprotein p1 [Grapevine Anatolian ringspot virus] >emb|CCG47847.1| polyprotein p1 [Grapevine Anatolian ringspot virus]	0.0001	YP_006576510.1
Grapevine Bulgarian latent virus	polyprotein segment 1 [Grapevine Bulgarian latent virus] >emb|CBL43395.1| polyprotein segment 1 [Grapevine Bulgarian latent virus]	7e-08	YP_004429248.1
Grapevine chrome mosaic virus	cysteine protease [Grapevine chrome mosaic virus]	1e-08	YP_002000613.1
Grapevine deformation virus	proteinase [Grapevine deformation virus]	1e-07	YP_006347731.1
Grapevine fanleaf virus	protease [Grapevine fanleaf virus]	6e-07	NP_734037.2
Melon mild mottle virus	polyprotein [Melon mild mottle virus]	2e-09	BAJ16223.1
Radish mosaic virus	RNA1-polyprotein [Radish mosaic virus]	1e-08	BAG84602.1
Raspberry ringspot virus	polyprotein 1 [Raspberry ringspot virus] >sp|Q6W8W4.1|POL1_RRVC RecName: Full=RNA1 polyprotein; AltName: Full=P1; Contains: RecName: Full=P1A protein; Short=1A; AltName: Full=Protease cofactor; Contains: RecName: Full=Putative ATP-dependent helicase; AltName: Full=1B; AltName: Full=Membrane-binding protein; AltName: Full=NTP-binding protein; Short=NTB; Contains: RecName: Full=Viral genome-linked …	1e-08	NP_944487.1
Red clover mottle virus	protease [Red clover mottle virus]	4e-07	NP_734029.1
Squash mosaic virus	protease [Squash mosaic virus]	0.002	NP_734011.1
Tomato black ring virus	proteinase [Tomato black ring virus]	0.3	CAA65340.1
Tomato white ringspot virus	polyprotein [Tomato white ringspot virus]	1e-07	ABM65095.1
Turnip ringspot virus	polyprotein [Turnip ringspot virus]	1e-08	ADZ54704.1
ANIMAL
Enterovirus A	3C [Human coxsackievirus A24]	4e-124	ADZ57550.1
Enterovirus D	polyprotein [Enterovirus D] >sp|P32537.4|POLG_HE701 RecName: Full=Genome polyprotein; Contains: RecName: Full=Protein VP0; AltName: Full=VP4-VP2; Contains: RecName: Full=Protein VP4; AltName: Full=P1A; AltName: Full=Virion protein 4; Contains: RecName: Full=Protein VP2; AltName: Full=P1B; AltName: Full=Virion protein 2; Contains: RecName: Full=Protein VP3; AltName: Full=P1C; AltName: Full=Virion …	9e-77	NP_040760.1
Enterovirus H	polyprotein [Simian enterovirus 19]	5e-71	AAL69626.2
Enterovirus G	polyprotein [Porcine enterovirus 10]	1e-68	AAM00276.1
Enterovirus F	polyprotein [Enterovirus F]	6e-67	AAZ73369.1
Enterovirus E	polyprotein [Enterovirus E] >dbj|BAA24003.1| polyprotein [Enterovirus E]	7e-67	NP_045756.1
Rhinovirus B	3C (protease) [Human rhinovirus B14] >pdb|2B0F|A Chain A, Nmr Structure Of The Human Rhinovirus 3c Protease (Serotype 14) With Covalently Bound Ace-Lealfq-Ethylpropionate Inhibitor >pdb|2IN2|A Chain A, Nmr Structure Of The Apo Human Rhinovirus 3c Protease (Serotype 14) >gb|AAA45757.1| protease precursor, partial [Human rhinovirus sp.]	2e-53	NP_740524.1
Simian sapelovirus	3C [Simian sapelovirus 1]	7e-50	NP_937978.1
Rhinovirus C	3C [Rhinovirus C]	3e-48	YP_001552441.1
Rhinovirus A	hypothetical protein HRV89gp1 [Rhinovirus A] >sp|P07210.3|POLG_HRV8A RecName: Full=Genome polyprotein; Contains: RecName: Full=Protein VP0; AltName: Full=VP4-VP2; Contains: RecName: Full=Protein VP4; AltName: Full=P1A; AltName: Full=Virion protein 4; Contains: RecName: Full=Protein VP2; AltName: Full=P1B; AltName: Full=Virion protein 2; Contains: RecName: Full=Protein VP3; AltName: Full=P1C; AltN…	1e-44	NP_042288.1
Feline picornavirus	polyprotein [Feline picornavirus]	7e-41	AET06140.1
Avian sapelovirus	polyprotein [Avian sapelovirus] >gb|AAT67220.1| polyprotein [Avian sapelovirus]	1e-36	YP_164335.1
Enterovirus C	3CD, partial [Human poliovirus 1]	5e-19	AFN85042.1
Equine rhinitis A virus	3C (proteinase) [Equine rhinitis A virus]	0.011	NP_740382.1
Ljungan virus	Picornain 3C [Ljungan virus]	0.017	NP_705883.1
Enterovirus B	3B(VPg) [Enterovirus B]	0.02	NP_740545.1
Enterovirus J	3B (VPg) [Enterovirus J]	0.18	YP_003359174.1
Porcine sapelovirus	3A/3B protein, partial [Porcine sapelovirus]	0.24	AFX59977.1
Foot-and-mouth disease virus	3C proteinase [Foot-and-mouth disease virus - type SAT 1]	2.2	AAX81546.1
Human parechovirus	polyprotein [Human parechovirus 5]	3.7	CAJ84483.1

## Sheet: ICTV summary
						PLANTS	ANIMALS	(INSECTS)
			animal hit	acc no.									plant	animal	insect
			sacbrood virus	AAK16273		1	3	3				CRLV CP	2	3	3
			Aichi virus	BAJ84193.1		3	16	(6)				CRLV Pro	3	16	6
			Nilaparvata lugens honeydew virus-2	YP_008130309.1		2	65	(22)				RTSV CP	2	41	15
			Acute bee paralysis virus	NP_066241		3	22	(12)				RTSV Pro	1	15	12
			Bovine calicivirus	CAA09481		3	62	(0)				SMoV CP	2	22	0
			Human cosavirus A	YP_002956106		1	26	(2)				SMoV Pro	1	14	2
			Human parechovirus 3	BAM64945.1		2	68	(8)				ToTV CP	2	31	8
			5 iteration and some ns hit with insect			n/a	n/a					ToTV Pro	0	0	0
						13	0					BBWV1 CP	12	0	0
			Human parechovirus 3	ADA79691.1		20	19	(9)				BBWV1 Pro	18	10	0
						14	0					CPMV CP	14	0	0
			Duck hepatitis A virus 1	YP_007969882.1		26	40	(0)				CPMV Pro	24	27	0
			polyprotein [Sapovirus Hu/Angelholm/SW314/2004/SE]	ABA00801.1		14	28					TRSV CP	14	17	3
			Human coxsackievirus A24	AGG78211.1		25	16	(1)				TRSV Pro	25	20	0
